# Supplementary material
Source: PubMed Central journal article supplement (PMC8606614)
Supplement: NIHMS1707745-supplement-fS2.pdf [file NIHMS1707745-supplement-fS2.pdf]

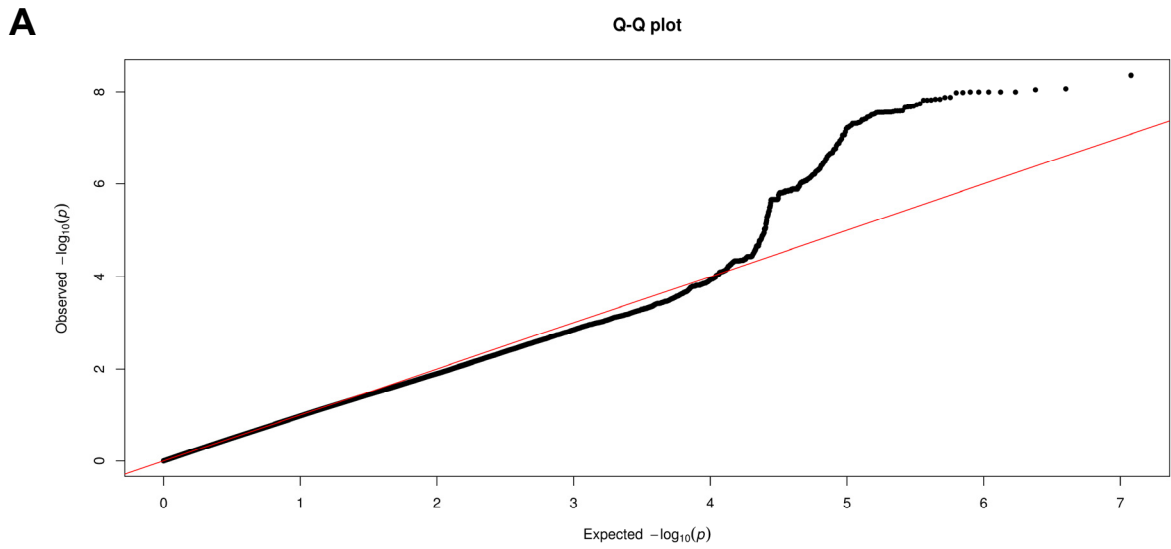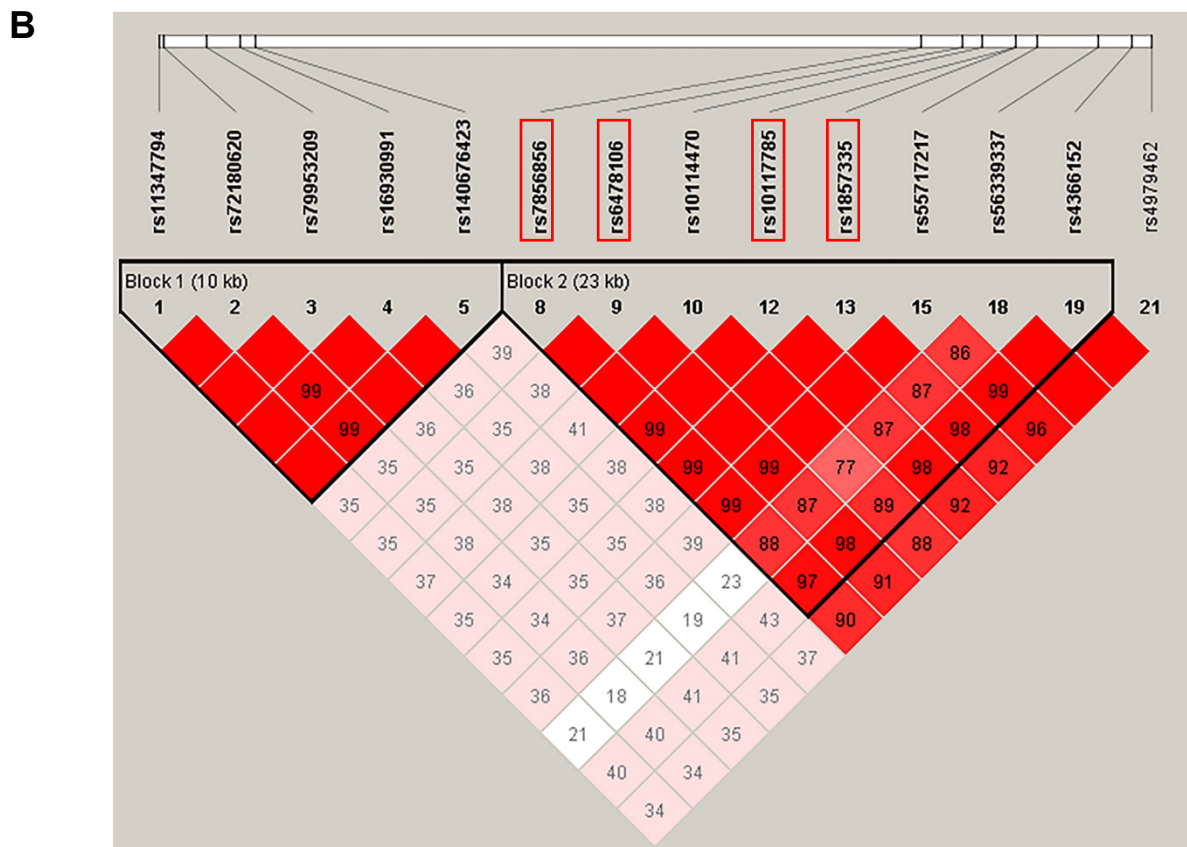

**Figure S2. The Quantile-quantile (QQ) Plot and haplotypes of *TNFSF15* SNPs.** (A) Quantile–quantile plot in the discovery group. The negative logarithm of the observed (y-axis) and the expected (x-axis) P value is plotted for each SNP (dot), and the red line indicates the null hypothesis of no true association. This plot suggests that deviated signals indicate true association. (B) The relative positions of *TNFSF15* SNPs (build 37.3) are displayed, along with the basic gene structure, above the Haploview diagram. The relative linkage disequilibrium (LD) between pairs of *TNFSF15* SNPs is color-indicated. This was based on  $D'$ , i.e., normalized linkage disequilibrium measure or  $D$  divided by the theoretical maximum for the observed allele frequencies, multiplied by 100. Values close to zero indicate no LD, while values approaching 100 indicate full LD. The red colored square represents varying degrees of  $LD < 1$  and  $LOD$  (logarithm of odds)  $> 2$  scores; darker shades indicate stronger LD.
