# Supplementary material
Source: PubMed Central journal article supplement (PMC8606614)
Supplement: NIHMS1707745-supplement-fS4.pdf [file NIHMS1707745-supplement-fS4.pdf]

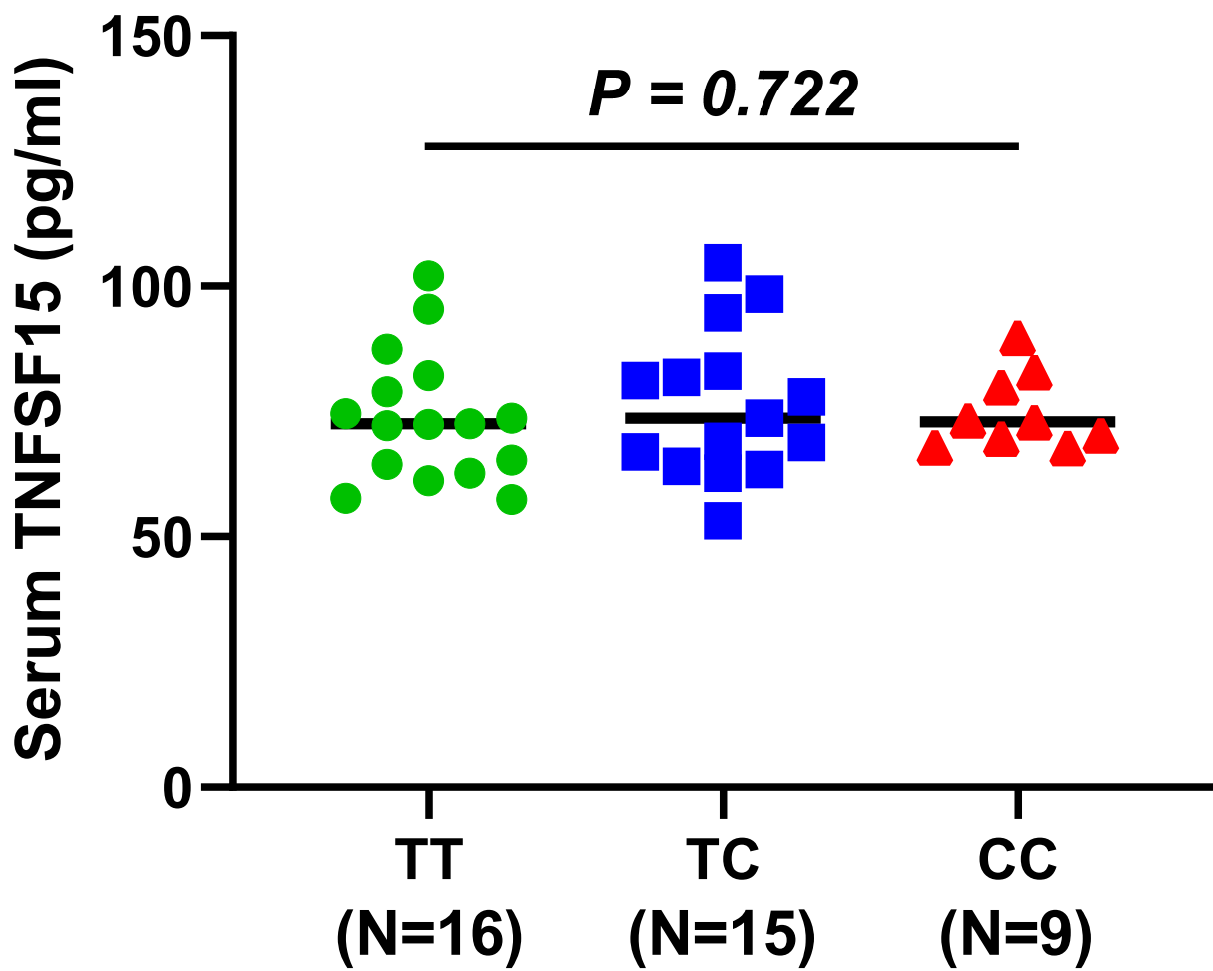

Figure S4. Serum TNFSF15 levels stratified by rs7856856 in control individuals. No significant differences or trends were observed between genotypes. (Jonckheere-Terpstrat test)
