# Supplementary material
Source: PubMed Central journal article supplement (PMC8606614)
Supplement: NIHMS1707745-supplement-fS5.pdf [file NIHMS1707745-supplement-fS5.pdf]

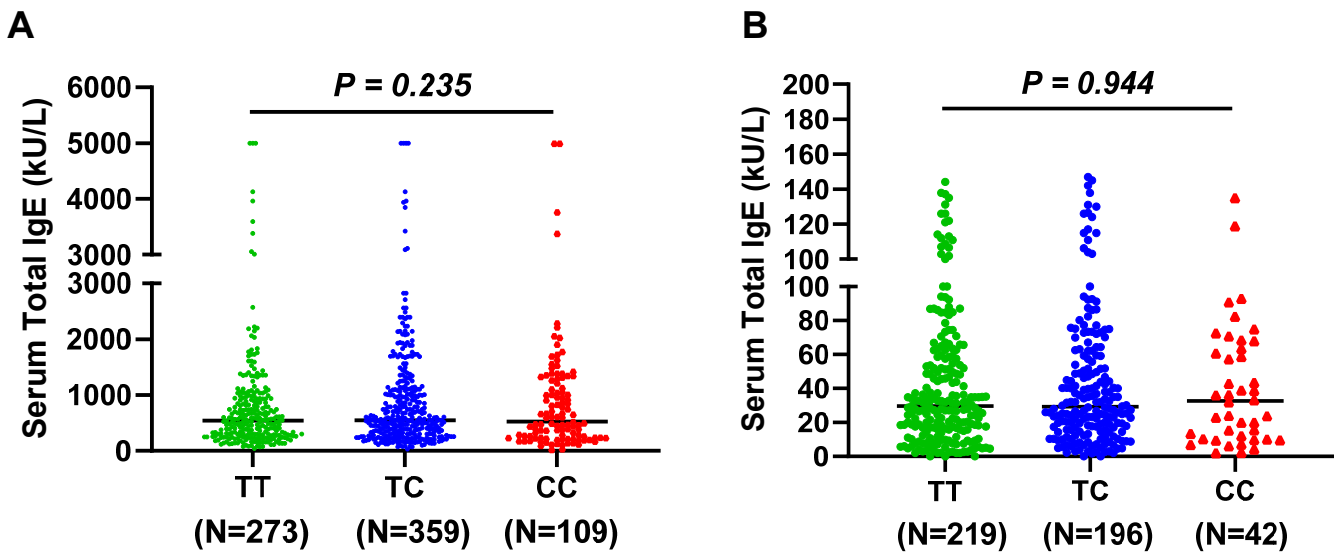

Figure S5. Serum IgE levels stratified by rs7856856 in case (A) and control (B) individuals in child cohort. No significant trends were observed between genotypes in both groups. (Jonckheere-Terpstrat test)
